# Supplementary material for: Identifying the descriptor governing NO oxidation on mullite Sm(Y, Tb, Gd, Lu)Mn2O5for diesel exhaust cleaning
Source: Royal Society of Chemistry journal article supplement (doi:10.1039/c5cy01798j), 2016-01-01
Supplement: c5cy01798j1.pdf [file c5cy01798j1.pdf]

## Supplementary Information

### Identifying Descriptor of Governing NO Oxidation on Mullite Sm(Y, Tb, Gd, Lu)Mn<sub>2</sub>O<sub>5</sub> for Diesel Exhaust Cleaning

Hao-Bo Li<sup>1</sup>, Wei-Hua Wang<sup>1</sup>, Xinyu Qian<sup>1</sup>, Yahui Cheng<sup>1</sup>, Xinjian Xie<sup>2</sup>, Jieyu Liu<sup>1</sup>, Shuhui Sun<sup>3</sup>, Jigang Zhou<sup>4</sup>, Yongfeng Hu<sup>4</sup>, Jianping Xu<sup>5</sup>, Lan Li<sup>5</sup>, Yan Zhang<sup>6</sup>, Xiwen Du<sup>6</sup>, Kuanghong Gao<sup>7</sup>, Zhiqing Li<sup>7</sup>, Cui Zhang<sup>8</sup>, Shudong Wang<sup>9</sup>, Haijun Chen<sup>9</sup>, Yidong Zhao<sup>10</sup>, Feng Lu<sup>1,†</sup>, Weichao Wang<sup>1,†</sup>, Hui Liu<sup>1</sup>

<sup>1</sup>*Nankai University, College of Electronic Information and Optical Engineering, Tianjin, China, 300071*

<sup>2</sup>*School of Materials Science and Engineering, Hebei University of Technology, Tianjin, China, 300130*

<sup>3</sup>*Institut National de la Recherche Scientifique, Qu ébec, Canada J3X 1S2*

<sup>4</sup>*Canadian Light Source, Saskatoon, Canada, S7N 2V3*

<sup>5</sup>*Tianjin University of Technology, College of Science, Tianjin, China, 300384*

<sup>6</sup>*Tianjin University, School of Materials Science and Engineering, Tianjin, China, 300072*

<sup>7</sup>*Tianjin University, Department of Physics, Tianjin, China, 300072*

<sup>8</sup>*Nankai University, College of Chemistry, Tianjin, China, 300071.*

<sup>9</sup>*Dalian Institute of Chemical Physics, Chinese Academy of Sciences, Dalian, China, 116023.*

<sup>10</sup>*Beijing Synchrotron Radiation Facility, Chinese Academy of Sciences, Beijing, China, 100049.*

†To whom correspondence should be addressed.

Email: [lufeng@nankai.edu.cn](mailto:lufeng@nankai.edu.cn); [weichaowang@nankai.edu.cn](mailto:weichaowang@nankai.edu.cn)

| <b>Index</b>                 | <b>Page</b> |
|------------------------------|-------------|
| <b>Supplementary methods</b> | <b>3-5</b>  |
| <b>Figure S1-S5</b>          | <b>6-7</b>  |
| <b>Table S1</b>              | <b>8</b>    |
| <b>Reference</b>             | <b>9</b>    |

## Supplementary methods

**Hydrothermal synthesis of  $Sm(Tb, Y)Mn_2O_5$ .** All the  $Sm(Y, Tb)Mn_2O_5$  nanoparticles were synthesized by hydrothermal method. Rare-earth nitrate,  $Mn(CH_3CO_2)_2 \cdot 4H_2O$  and  $KMnO_4$  (all 99.98%, Aladdin) were dissolved in 25 ml deionized water in a molar ratio of 5:7:3 and stirred for 30 minutes. Then the NaOH (99.98%, Aladdin) solution of 5 M was added slowly and the mixture was stirred for another 10 minutes. The precursor was transferred to a 100 ml stainless steel Teflon-lined autoclave which was then filled to 60% of its capacity. The hydrothermal treatment was processed under 200 °C for 12 hours. After the autoclave was cooled down to the room temperature, the product was filtered and washed by deionized water and 1%  $HNO_3$  for 3~5 times. The precipitant was dried at 80 °C for 4 hours. To determine the phase purity, all the samples were characterized by X-ray diffraction (Rigaku Corporation, D/max-2500). The morphology of the nanoparticles was obtained from transmission electron microscope (TEM) by TECNAI F30.

**X-ray diffraction spectra.** The X-ray diffraction (XRD) spectra is plotted in Figure S1 and the pure mullite crystalline are in orthorhombic phases with space group of  $Pbam$ .

**BET surface area measurement.** The BET surface areas of samples were determined from  $N_2$  adsorption-desorption experiments, which was carried out at -196 °C on

Microporous instrument Tristar 3000. The samples were outgassed for 10 hours at 300 °C to remove any moisture or adsorbed contaminants that may have been present on their surface. The specific surface area (SBET) was calculated using the Brunauer-Emmett-Teller (BET) method, which was presented in Tristar 3000 apparatus.

**Catalytic characterization.** All the samples are in powder form and the catalytic measurement was carried out using a flow through powder reactor system equipped with a Fourier Transform Infrared (FT-IR) spectrometer (Nicolet 6700) with a gas sampling cell at atmospheric pressure. The samples weight was 0.6 g and the total flow rate was 200 sccm, which consists of 450 ppmv NO and 10% O<sub>2</sub>/He. The NO conversion was obtained by calculating the molar ratio between the produced NO<sub>2</sub> to the entered NO.

**DFT calculations of bulk mullite oxides.** The Sm(Y, Tb)Mn<sub>2</sub>O<sub>5</sub> system belongs to orthorhombic space group *Pbam* containing two different types of Mn-O ligand field of octahedral and square pyramid as shown in Figure S2. In fact neutron and x-ray diffraction studies claim that the actual symmetry group is *Pb2<sub>1</sub>m*, which results in complicated magnetic structures and macroscopic electric polarization along the *b* direction<sup>1-3</sup>. In order to fit the magnetic period, the calculated structure of Sm(Y, Tb)Mn<sub>2</sub>O<sub>5</sub> contains a 2×1×1 unit cell which is in line with other collinear calculations on mullite<sup>4-6</sup>. Along the *b* direction, the spin ordering of the Mn ions in Sm(Y,

Tb)Mn<sub>2</sub>O<sub>5</sub> could be schematically represented as a chain of Mn<sub>pyr</sub><sup>↑</sup> – O<sub>bulk</sub> – Mn<sub>oct</sub><sup>↑</sup> – O<sub>bulk</sub> – Mn<sub>pyr</sub><sup>↓</sup> as shown in Figure S2. The Mn<sub>pyr</sub><sup>↑</sup> – O<sub>bulk</sub> – Mn<sub>oct</sub><sup>↑</sup> part of the chain plays key role in governing the O\* releasing difficulty. The spin-splitting *d*-band alignment is verified by investigating the partial charge distribution within the certain range of the projected density of states of Mn ions. As the *d*-orbitals expand, the *d*-orbitals overlap with each other, thus the regions contributed by certain *d*-orbitals are labeled in Figure S3 to identify the *d*-orbitals sequence.

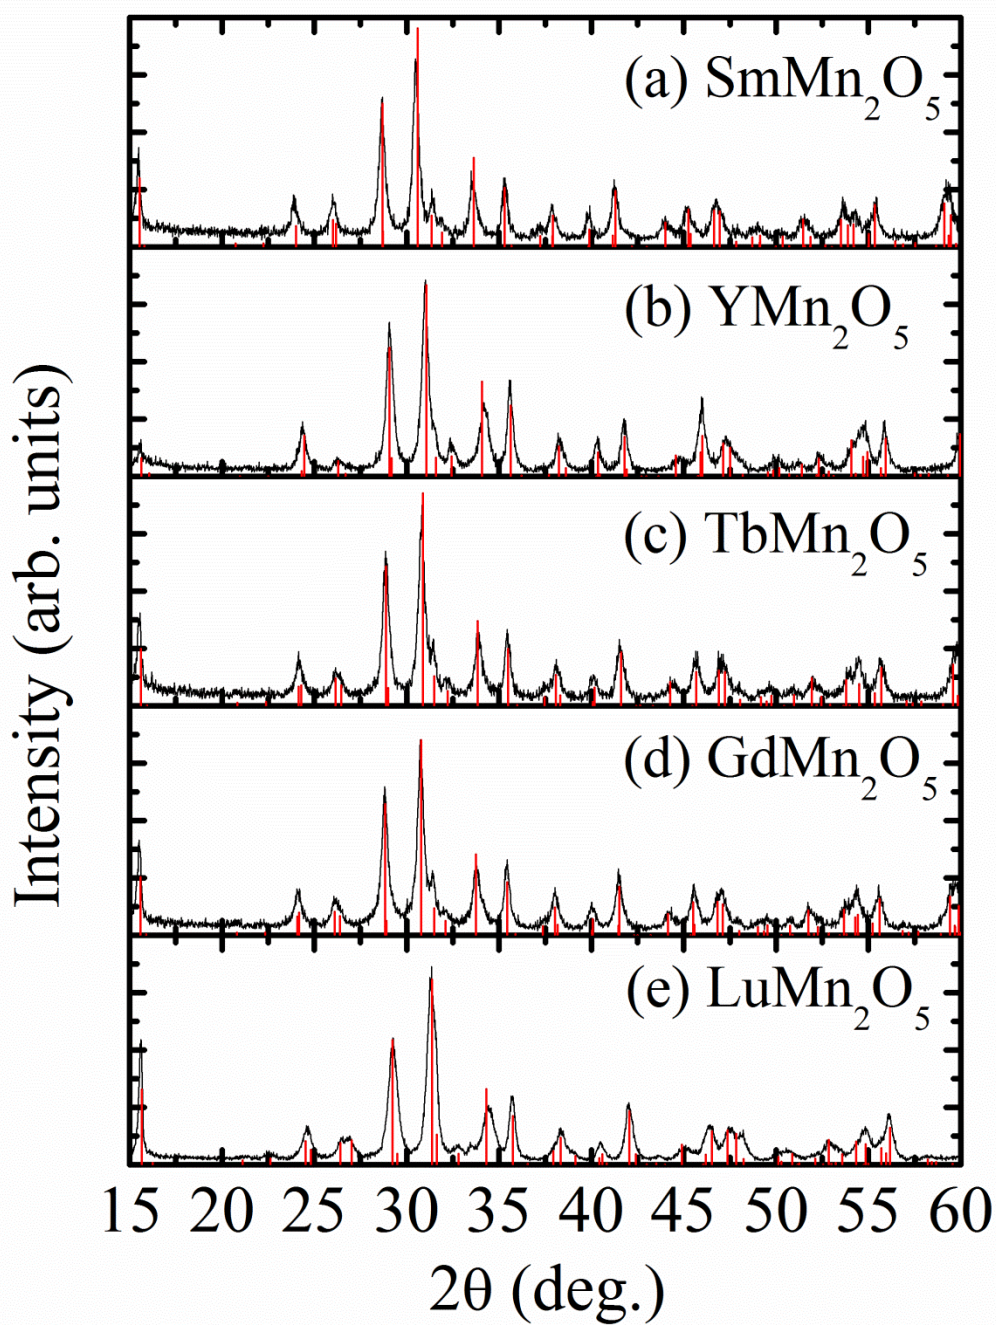

**Figure S1.** The XRD spectra of  $\text{AMn}_2\text{O}_5$  ( $A=\text{Sm}, \text{Y}, \text{Tb}, \text{Gd}, \text{Lu}$ ). The red line are the standard peaks.

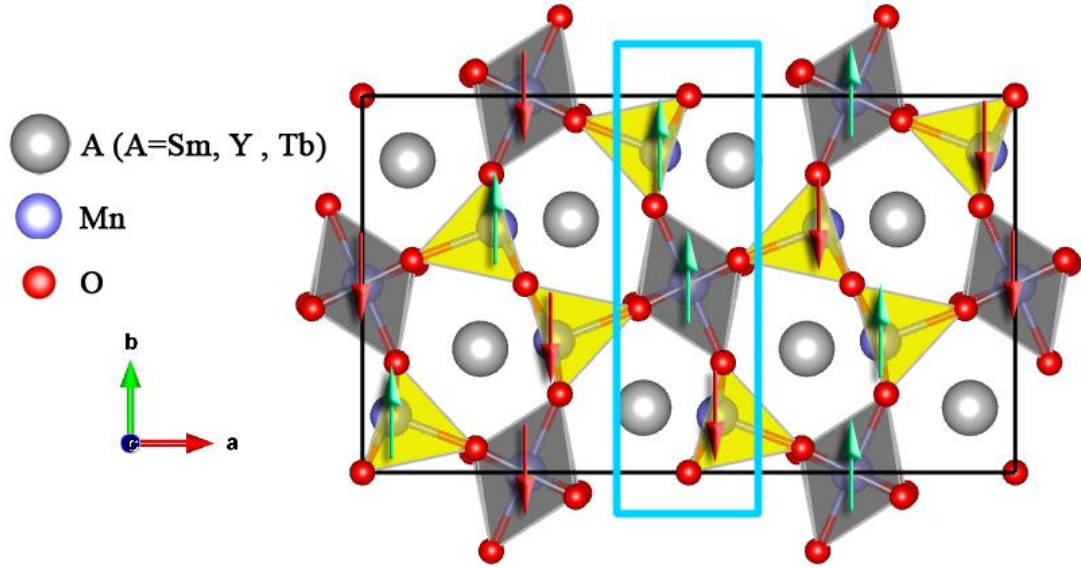

**Figure S2.** (Color online) The  $2 \times 1 \times 1$  unit cell of  $\text{Sm}(\text{Y}, \text{Tb})\text{Mn}_2\text{O}_5$ . The two types of ligand field: octahedral and square pyramid are labeled by grey and yellow area, respectively. The arrows represent the spin configuration in collinear approximation in calculations. The blue square denotes the  $\text{Mn}_{\text{pyr}}^{\uparrow} - \text{O}_{\text{bulk}} - \text{Mn}_{\text{oct}}^{\uparrow} - \text{O}_{\text{bulk}} - \text{Mn}_{\text{pyr}}^{\downarrow}$  chain.

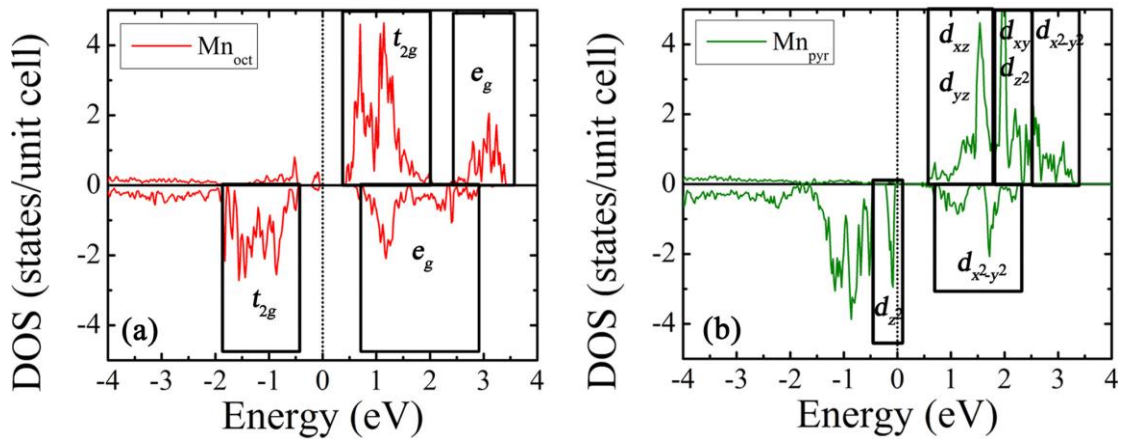

**Figure S3.** (Color online) Spin-polarized projected density of states (PDOS). (a), PDOS of  $\text{Mn}_{\text{oct}}-3d$ . (b), PDOS of  $\text{Mn}_{\text{pyr}}-3d$ . Regions contributed by different orbitals are labeled.

Table S1: The BET surface area of different samples.

| <b>Sample</b>                    | <b>BET surface area (m<sup>2</sup>/g)</b> |
|----------------------------------|-------------------------------------------|
| SmMn <sub>2</sub> O <sub>5</sub> | 54.3                                      |
| YMn <sub>2</sub> O <sub>5</sub>  | 55.6                                      |
| TbMn <sub>2</sub> O <sub>5</sub> | 52.1                                      |
| LuMn <sub>2</sub> O <sub>5</sub> | 54.4                                      |
| GdMn <sub>2</sub> O <sub>5</sub> | 68.0                                      |



## Reference

---

- <sup>1</sup> I. Kagomiya, S. Mastumoto, K. Kohn, Y. Fukuda, T. Shoubu, H. Kimura, Y. Noda, and N. Ikeda, *Ferroelectrics* **286**, 167 (2003).
- <sup>2</sup> L. C. Chapon, G. R. Blake, M. J. Gutmann, S. Park, N. Hur, P. G. Radaelli, S-W. Cheong, *Phys. Rev. Lett.* **93**, 177402. (2004).
- <sup>3</sup> J. A. Alonso, M. T. Casais, M. J. Martínez-Lopey, J. L. Martínez, and M. T. Fernández-Dáz, *J. Phys.: Condens. Matter* **9**, 8515 (1997).
- <sup>4</sup> C. Wang, G.-C. Guo and L. He, *Phys. Rev. Lett.* **99**, 177202 (2007).
- <sup>5</sup> G. Giovannetti and J. Brink, *Phys. Rev. Lett.* **100**, 227603 (2008).
- <sup>6</sup> T. -R. Chang, H.-T. Jeng, C.-Y. Ren and C.-S. Hsue, *Phys. Rev. B* **84**, 024421. (2011).
